# Supplementary material
Source: PubMed Central journal article supplement (PMC5814981)
Supplement: jamacardiol-2-478-s001.pdf [file jamacardiol-2-478-s001.pdf]

## Supplementary Online Content

Secemsky EA, Yeh RW, Kereiakes DJ, et al; DAPT Study Investigators. Mortality following cardiovascular and bleeding events occurring beyond 1 year after coronary stenting: a secondary analysis of the Dual Antiplatelet Therapy (DAPT) Study. *JAMA Cardiol*. Published online March 15, 2017. doi:10.1001/jamacardio.2017.0063

**eTable 1.** Risk of Mortality After Ischemic and Bleeding Events During the 21-Month Post-Randomization Period, Stratified by <30 or ≥30 Days From Time of Event

**eTable 2.** Frequency of Bleeding Events and Death by BARC Classification

This supplementary material has been provided by the authors to give readers additional information about their work.

**eTable 1.** Risk of Mortality After Ischemic and Bleeding Events During the 21-Month Postrandomization Period, Stratified by  $\leq 30$  or  $>30$  Days From Time of Event

| <b>Endpoints</b>                                                                                                                                                                                                                                                                                                                                                                                 | <b>Adjusted HR for Mortality,* <math>\leq 30</math> days (95% CI)</b> | <b>Adjusted HR for Mortality,* <math>&gt;30</math> days (95% CI)</b> |
|--------------------------------------------------------------------------------------------------------------------------------------------------------------------------------------------------------------------------------------------------------------------------------------------------------------------------------------------------------------------------------------------------|-----------------------------------------------------------------------|----------------------------------------------------------------------|
| <b>Ischemic Events</b>                                                                                                                                                                                                                                                                                                                                                                           |                                                                       |                                                                      |
| MI not related to ST                                                                                                                                                                                                                                                                                                                                                                             | 33.0 (17.8-61.3)                                                      | 5.8 (3.6-9.4)                                                        |
| Definite or probable ST                                                                                                                                                                                                                                                                                                                                                                          | 135.8 (75.1-245.3)                                                    | 1.0 (0.1-6.9)                                                        |
| Ischemic stroke                                                                                                                                                                                                                                                                                                                                                                                  | 95.7 (48.1-190.4)                                                     | 3.4 (1.1-10.7)                                                       |
| Any MI, definite or probable ST, or ischemic stroke                                                                                                                                                                                                                                                                                                                                              | 72.0 (48.8-106.4)                                                     | 4.1 (2.5-6.5)                                                        |
| <b>Bleeding Events</b>                                                                                                                                                                                                                                                                                                                                                                           |                                                                       |                                                                      |
| GUSTO moderate bleed                                                                                                                                                                                                                                                                                                                                                                             | 40.5 (18.8-87.2)                                                      | 4.4 (2.1-9.0)                                                        |
| GUSTO severe bleed                                                                                                                                                                                                                                                                                                                                                                               | 230.8 (136.6-389.8)                                                   | 10.1 (4.9-20.9)                                                      |
| GUSTO moderate/severe bleed                                                                                                                                                                                                                                                                                                                                                                      | 103.4 (66.9-159.8)                                                    | 6.3 (3.7-10.6)                                                       |
| BARC 2, 3, or 5 bleed                                                                                                                                                                                                                                                                                                                                                                            | 53.4 (34.7-82.0)                                                      | 3.8 (2.4-6.0)                                                        |
| BARC 2 or 3 bleed                                                                                                                                                                                                                                                                                                                                                                                | 20.8 (11.2-38.5)                                                      | 3.7 (2.3-5.9)                                                        |
| BARC 3 or 5 bleed                                                                                                                                                                                                                                                                                                                                                                                | 92.5 (59.5-143.6)                                                     | 5.6 (3.3-9.6)                                                        |
| BARC 2 bleed                                                                                                                                                                                                                                                                                                                                                                                     | 10.4 (3.3-32.6)                                                       | 2.7 (1.4-5.3)                                                        |
| BARC 3 bleed                                                                                                                                                                                                                                                                                                                                                                                     | 31.7 (16.1-62.6)                                                      | 5.5 (3.2-9.5)                                                        |
| *Adjusted models were stratified by propensity score quintile. Propensity scores were derived from all variables included in Tables 1 and 2 in the article.<br>Abbreviations: BARC, Bleeding Academic Research Consortium; GUSTO, Global Utilization of Streptokinase and Tissue Plasminogen Activator for Occluded Arteries; HR, hazard ratio; MI, myocardial infarction; ST, stent thrombosis. |                                                                       |                                                                      |

**eTable 2.** Frequency of Bleeding Events and Death by BARC Classification

| <b>Bleeding Endpoint, No. (%)</b>                                                                                                                                                                                                                                                                                       | <b>Events after Randomization *</b> | <b>Rates of Death After an Event</b> | <b>Cumulative Incidence of Death After an Event</b> |
|-------------------------------------------------------------------------------------------------------------------------------------------------------------------------------------------------------------------------------------------------------------------------------------------------------------------------|-------------------------------------|--------------------------------------|-----------------------------------------------------|
| BARC 2, 3, or 5                                                                                                                                                                                                                                                                                                         | 481 (4.1)                           | 46 (9.56)                            | 0.42                                                |
| BARC 3 or 5                                                                                                                                                                                                                                                                                                             | 244 (2.1)                           | 39 (15.98)                           | 0.36                                                |
| BARC 2                                                                                                                                                                                                                                                                                                                  | 262 (2.3)                           | 12 (4.58)                            | 0.11                                                |
| BARC 3                                                                                                                                                                                                                                                                                                                  | 229 (1.97)                          | 24 (10.48)                           | 0.22                                                |
| BARC 5                                                                                                                                                                                                                                                                                                                  | 15 (0.13)                           | 15 (100.00)                          | 0.14                                                |
| <p>*The number of each event represents the number of patients with the event. Multiple types of events could be accrued by the same patient. For patients with &gt;1 of the same type of event, only the earliest event contributed to the analysis.<br/>Abbreviation: BARC, Bleeding Academic Research Consortium</p> |                                     |                                      |                                                     |
